# Supplementary material for: Characterization and Functional Analysis of CD44v6.CAR T Cells Endowed with a New Low-Affinity Nerve Growth Factor Receptor-Based Spacer
Source: PubMed Central journal article supplement — Hum Gene Ther. 2021 Jul 19;32(13-14):744–60. doi: 10.1089/hum.2020.216 (PMC8312023; doi:10.1089/hum.2020.216), 2021-07-19
Supplement: Supp_FigS3.pdf [file Supp_FigS3.pdf]

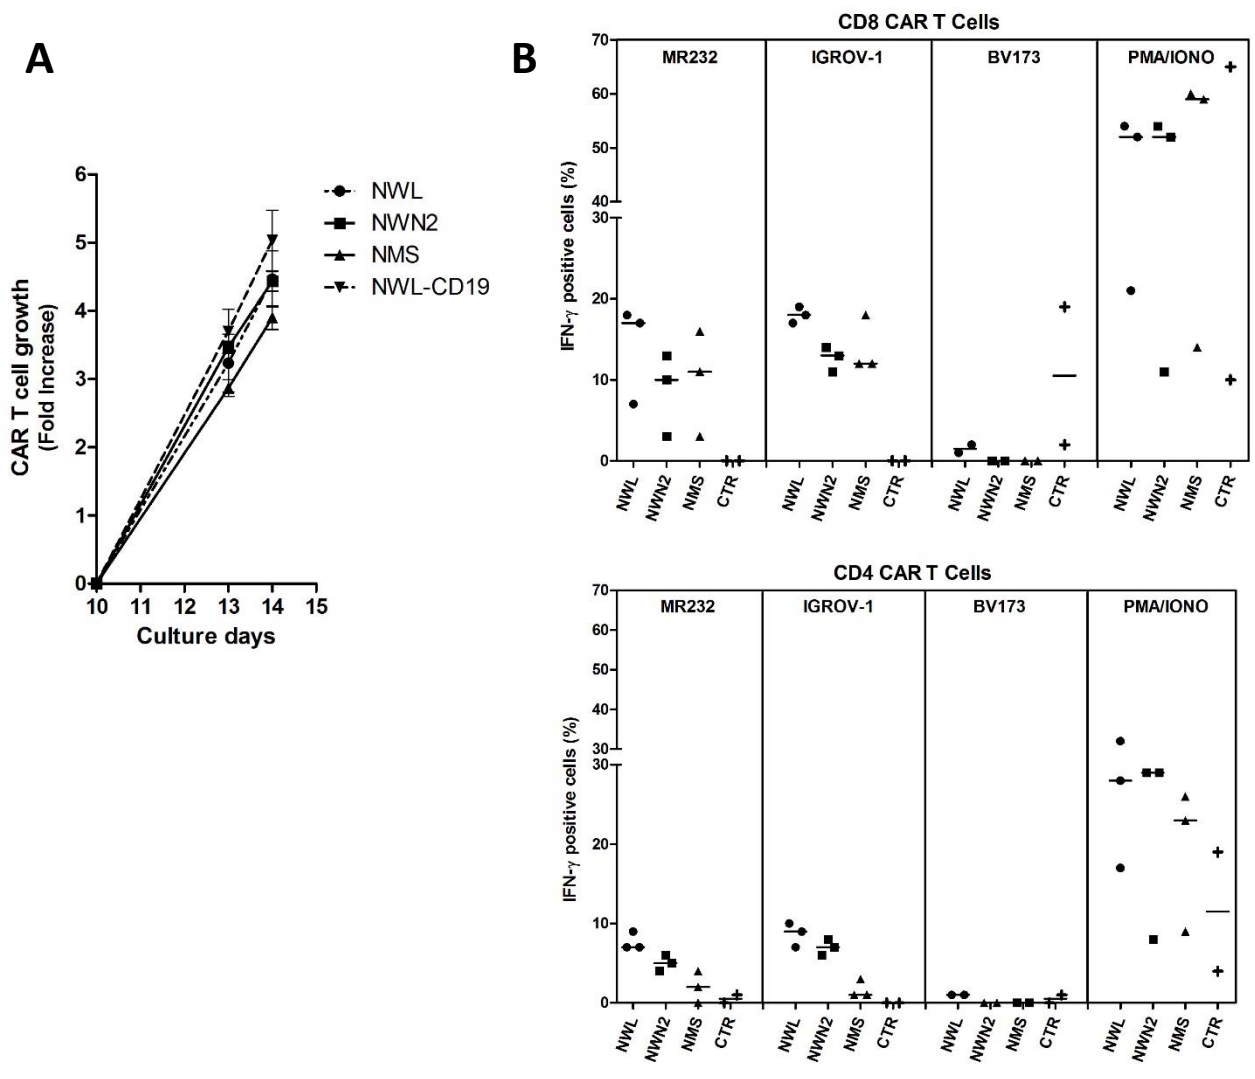

**Supplementary Figure 3. Impact of spacer region on T cells proliferation and activation.**

**(A)** Activation of the three CD44v6.CAR T (NWL, NWN2, and NMS) and NWL-CD19.CAR T cells (CTR) was analysed by co-culture with MR232, IGROV-1, and the CD44v6- BV173 (E:T ratio 1:1), or after PMA/Ionomycin stimulation (5 hours of incubation). Percentage of IFN- $\gamma$  positive CAR T cells was analyzed, by FACS analysis. Points, representing independent donors and mean are shown in the graphs.
