# Supplementary material for: Characterization and Functional Analysis of CD44v6.CAR T Cells Endowed with a New Low-Affinity Nerve Growth Factor Receptor-Based Spacer
Source: PubMed Central journal article supplement — Hum Gene Ther. 2021 Jul 19;32(13-14):744–60. doi: 10.1089/hum.2020.216 (PMC8312023; doi:10.1089/hum.2020.216), 2021-07-19
Supplement: Supp_FigS4.pdf [file Supp_FigS4.pdf]

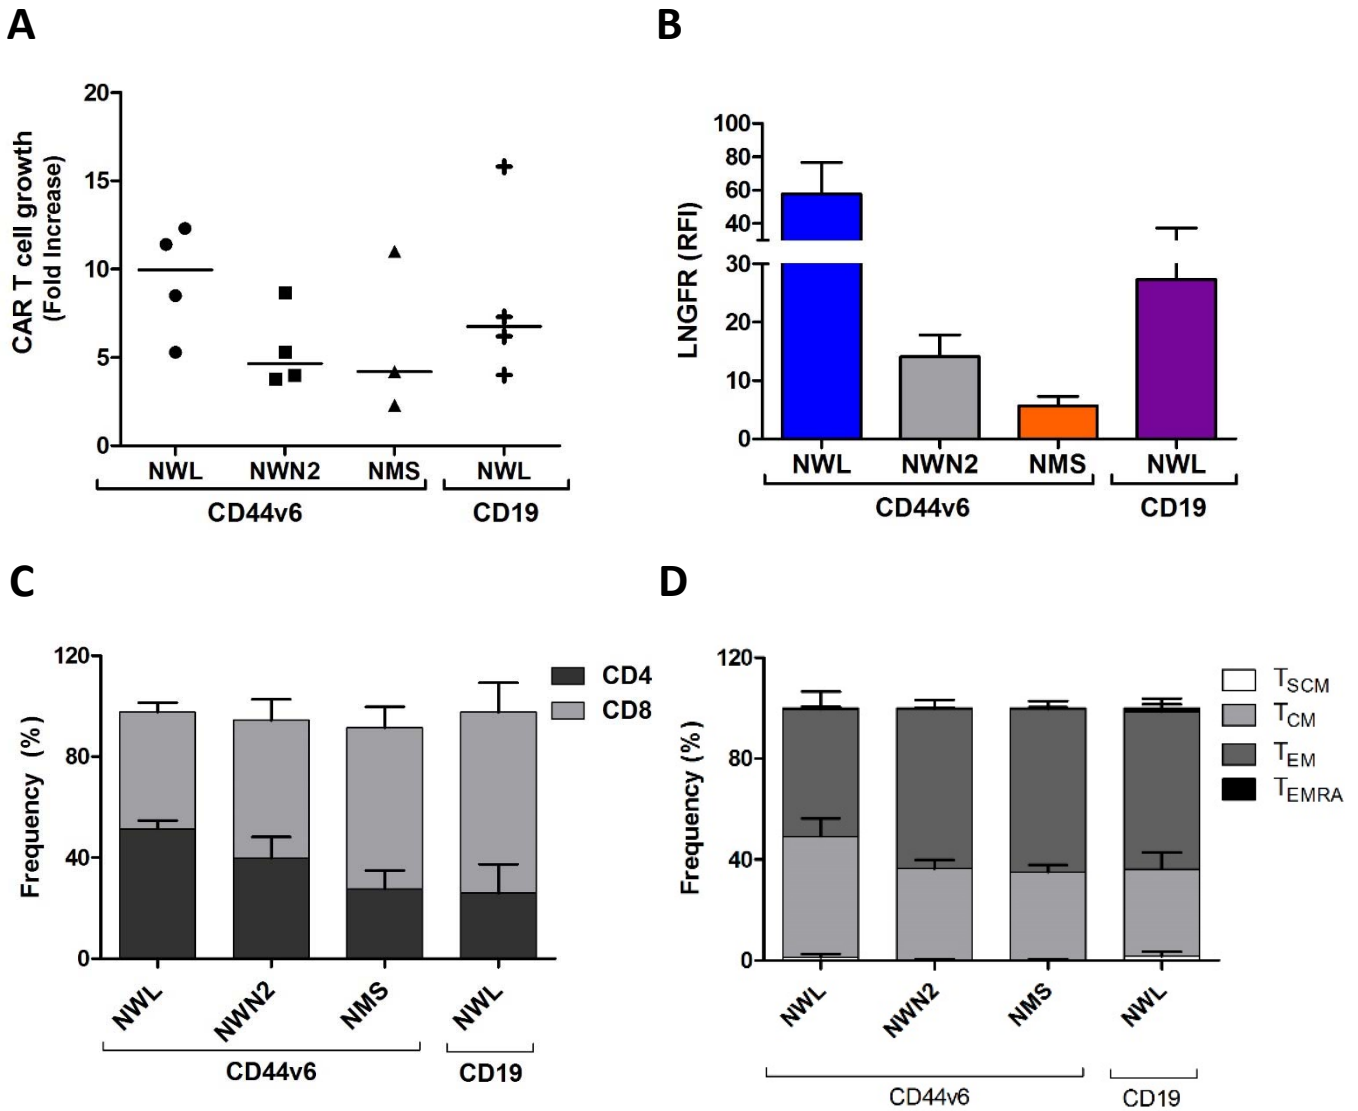

**Supplementary Figure 4.** Analysis of CD44v6.CAR T cells differentiated *in vitro*. CD44v6 CAR T cells (NWL, NWN2, and NMS), and CD19-NWL.CAR T cells at the end of manufacturing (day 10) were differentiated *in vitro* with IL-2 and OKT-3 until day 20. **(A)** CAR T cell expansion evaluated as fold increase. **(B)** CAR expression detected with the anti-LNGFR mAb C40-1457. **(C)** Percentage of CD4 and CD8 CAR T cells at day 20. **(D)** Memory phenotype defined by CD45RA and CD62L expression. T<sub>SCM</sub> (CD45RA+/CD62L+ memory stem T cells), T<sub>CM</sub> (CD45RA-/CD62L+ central memory T cells), T<sub>EM</sub> (CD45RA-/CD62L- effector memory T cells), T<sub>EMRA</sub> (CD45+/CD62L- effector memory RA T cells). Results of differentiated cells obtained from six (B and C), and three (D) independent experiments is shown (mean±SEM). **No significant differences between the CAR T cells, as percentage of CD4 and CD8 and memory populations, were detected (P>0.05, Bonferroni's Multiple Comparison Test).**
